# Supplementary material
Source: Springer Nature journal article supplement (https://www.springermedizin.de/resource/supplementary/12876_2010_538_MOESM3_ESM.pdf/9437266)

MW  
kDa

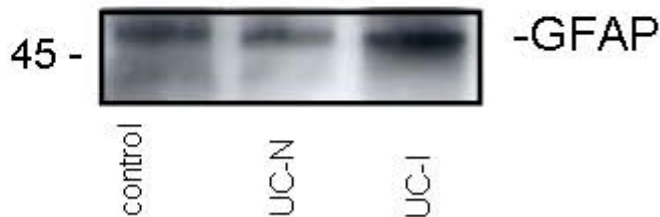

MW  
kDa

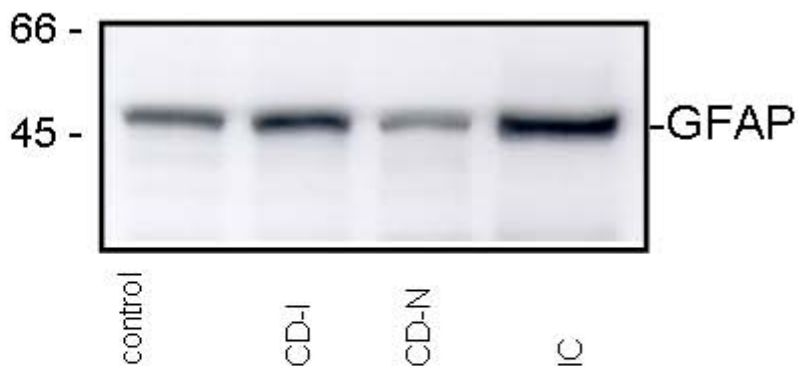

Supplement: MOESM3 [file 9437266]
